# Supplementary material for: Amination of polylactic acid to alanine using a Ru–Co bimetallic catalyst
Source: Royal Society of Chemistry journal article supplement (doi:10.1039/d4nj00473f), 2024-01-01
Supplement: d4nj00473f1.pdf [file d4nj00473f1.pdf]

## **Electronic Supplementary Information**

### **Amination of Polylactic Acid to Alanine by Ru-Co Bimetallic Catalyst**

Meng Cui,<sup>\*a</sup> Guyue Liu,<sup>a</sup> Cankun Ma,<sup>a</sup> Zihan Cao,<sup>a</sup> Yu Ye,<sup>a</sup> Yongfu Shen,<sup>a</sup> Xiuqin Zhang<sup>\*a</sup>

<sup>a</sup> Beijing Key Laboratory of Clothing Materials R&D and Assessment, Beijing Engineering Research Center of Textile Nanofiber, School of Materials Science and Engineering, Beijing Institute of Fashion Technology, Beijing 100029, China.

E-mail: cuimeng@bift.edu.cn; clyzxq@bift.edu.cn

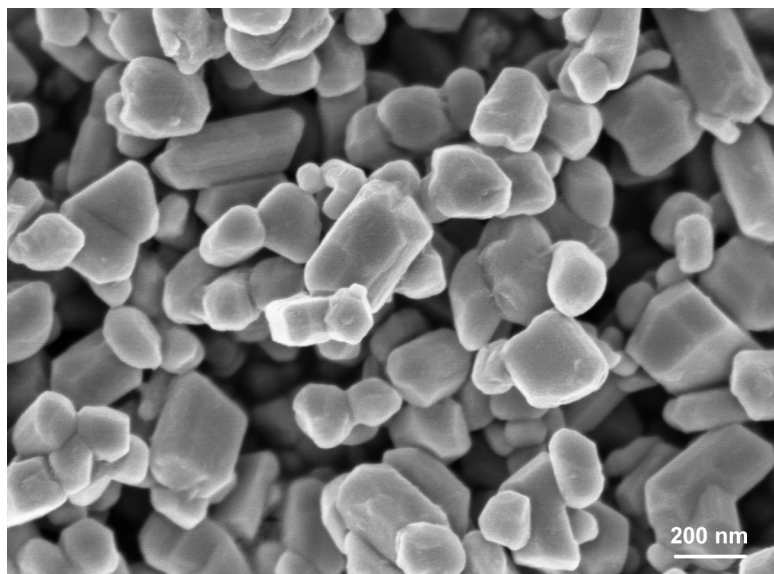

**Figure S1.** The scanning electron microscope (SEM) image of TiO<sub>2</sub>.

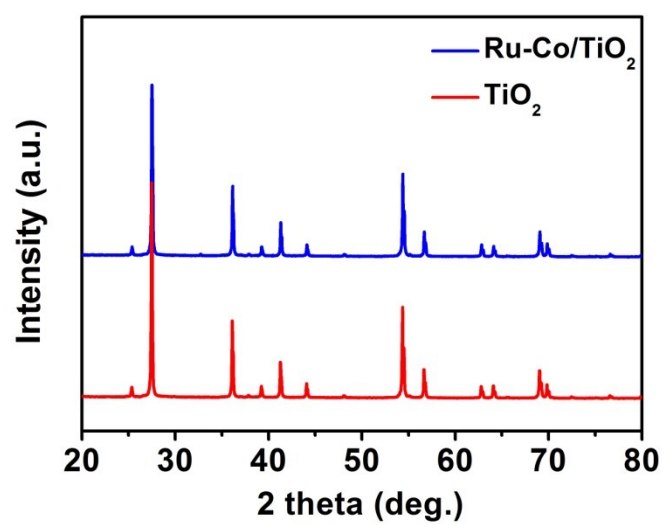

**Figure S2.** XRD patterns of TiO<sub>2</sub> and Ru-Co/TiO<sub>2</sub> catalyst.

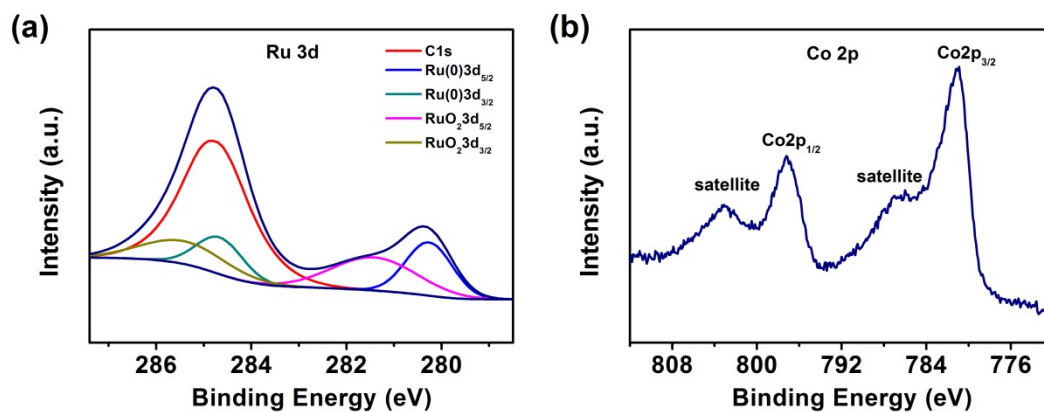

**Figure S3.** XPS spectra of the fresh Ru-Co/TiO<sub>2</sub> catalyst: (a) Ru 3d; (b) Co 2p.

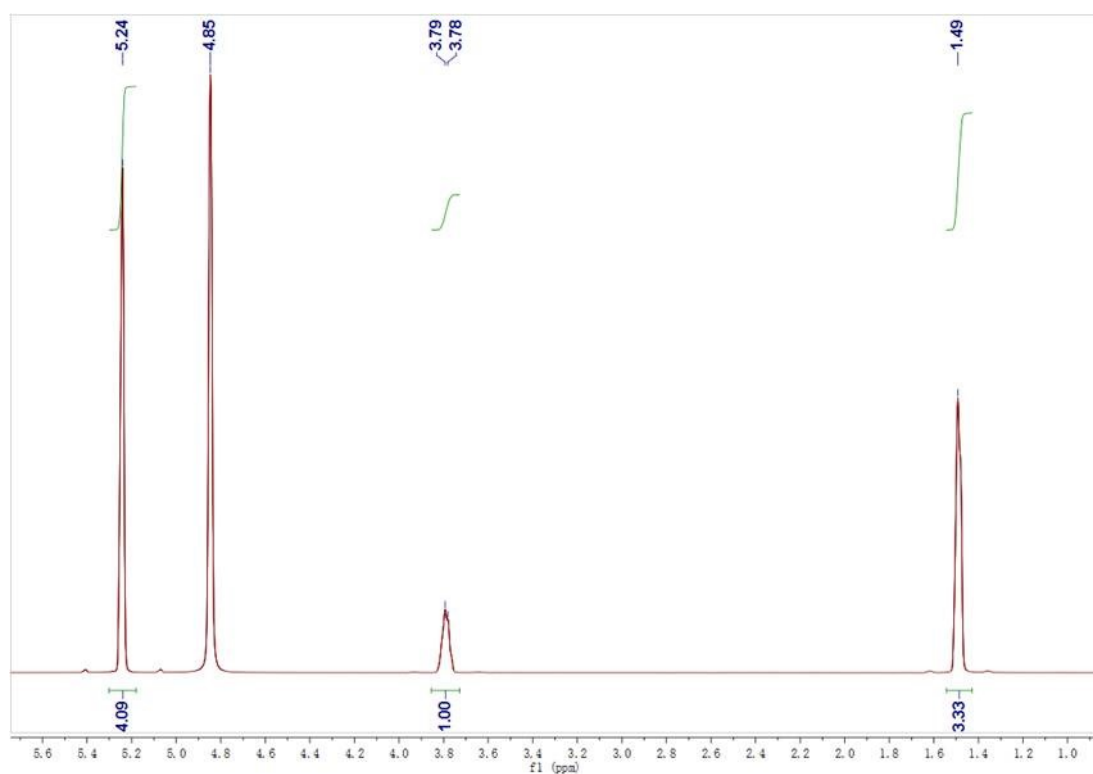

**Figure S4.**  $^1\text{H}$  NMR spectrum of commercial alanine (s-trioxane as internal standard, 5.24 ppm).

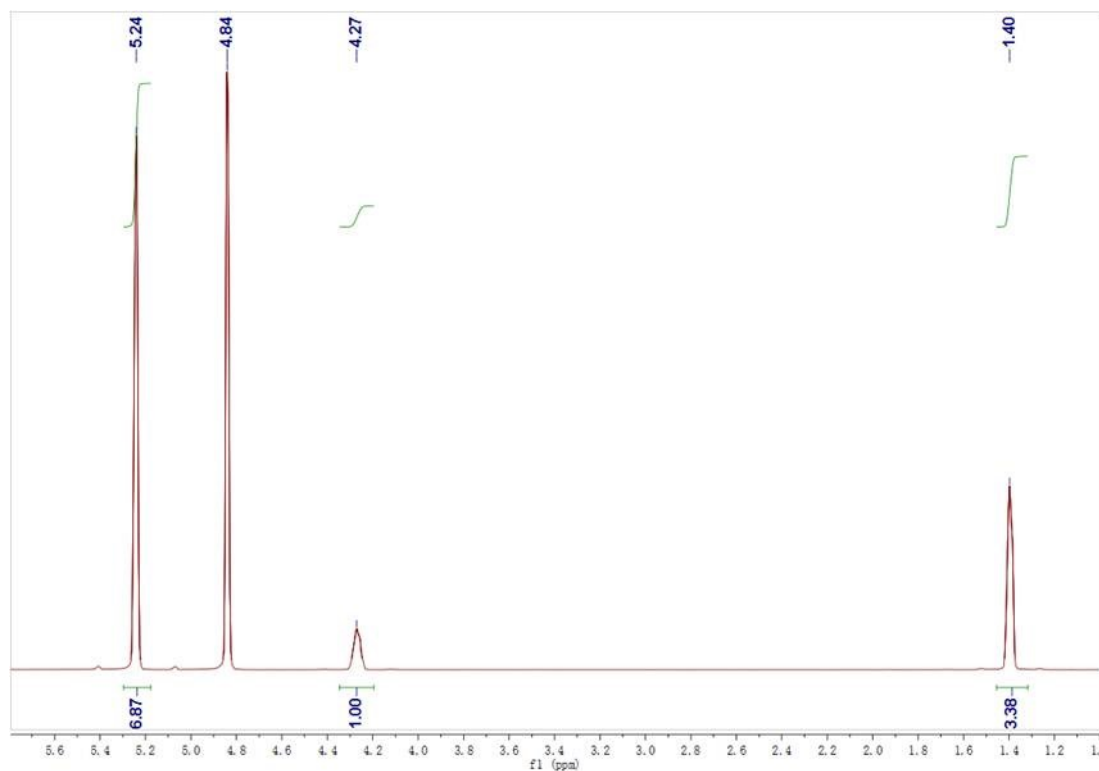

**Figure S5.**  $^1\text{H}$  NMR spectrum of commercial lactamide (s-trioxane as internal standard, 5.24 ppm).

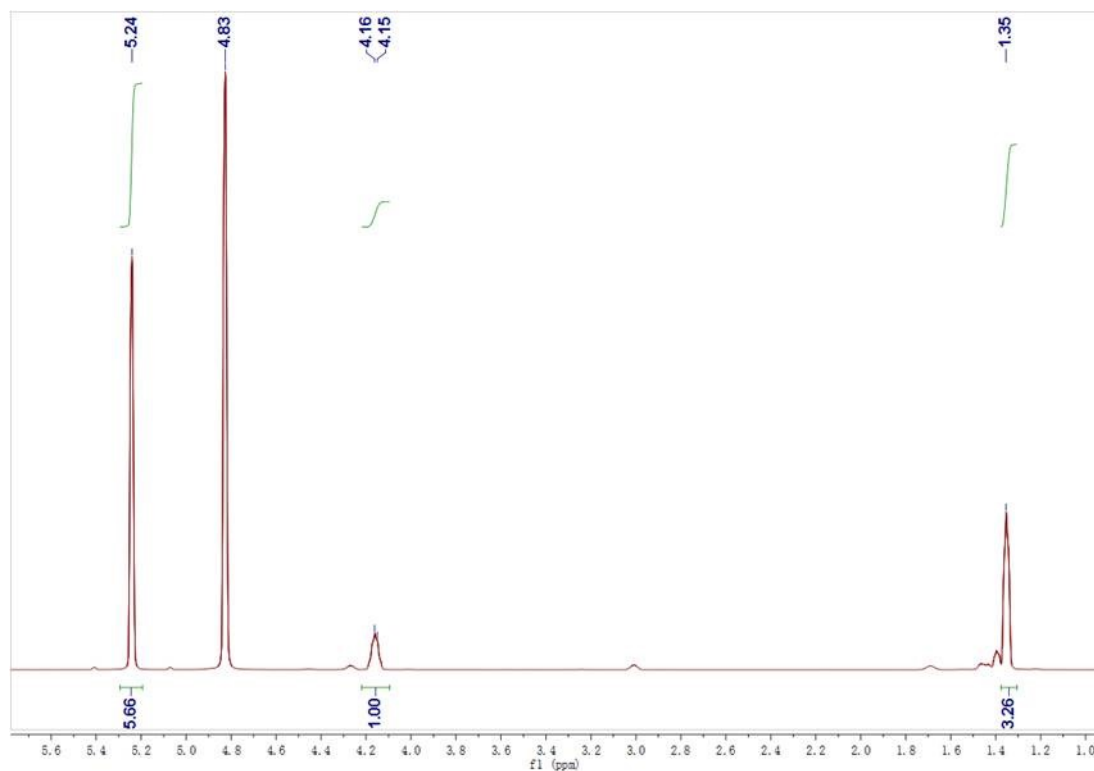

**Figure S6.**  $^1\text{H}$  NMR spectrum of commercial ammonium lactate (s-trioxane as internal standard, 5.24 ppm).

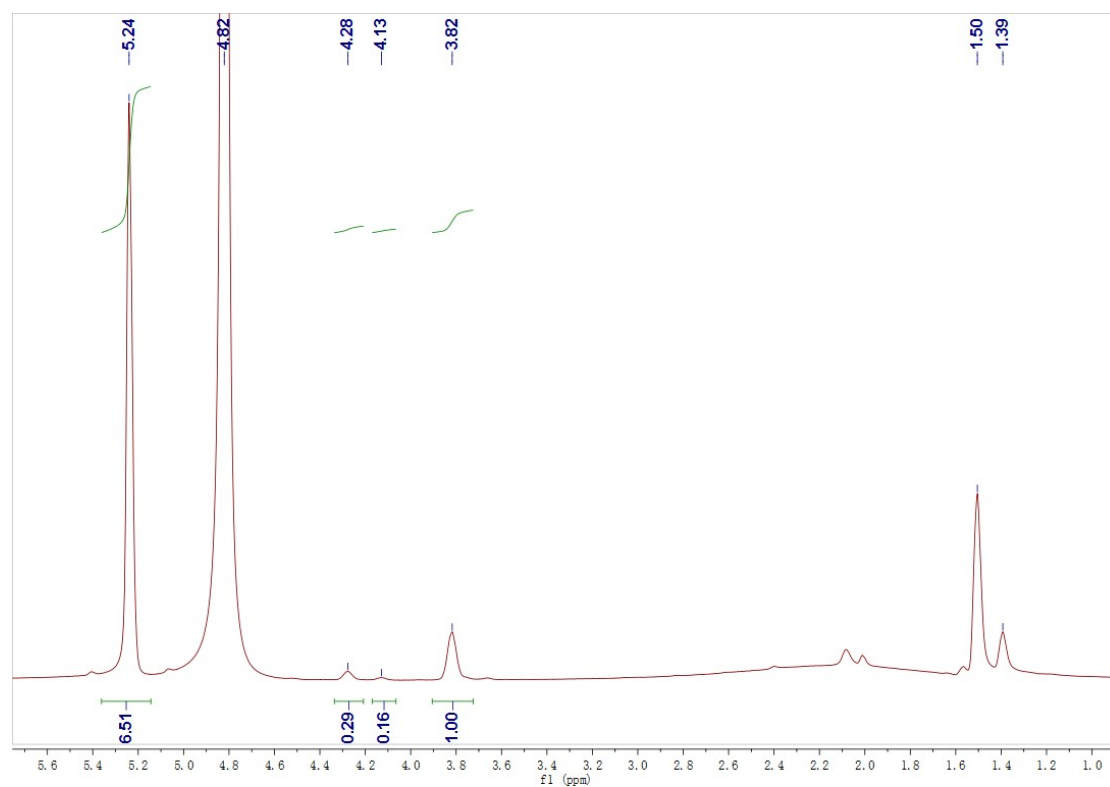

**Figure S7.**  $^1\text{H}$  NMR spectrum of produced alanine, lactamide and ammonium lactate (s-trioxane as internal standard, 5.24 ppm).

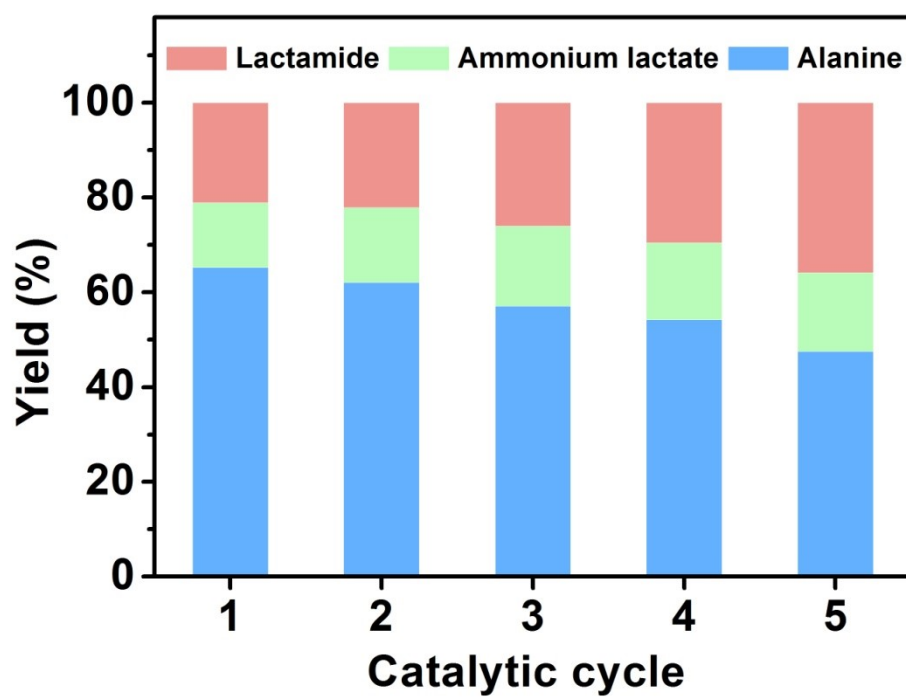

**Figure S8.** The results of recycling test. The reaction conditions were the same as that of entry 1 in Table 1.

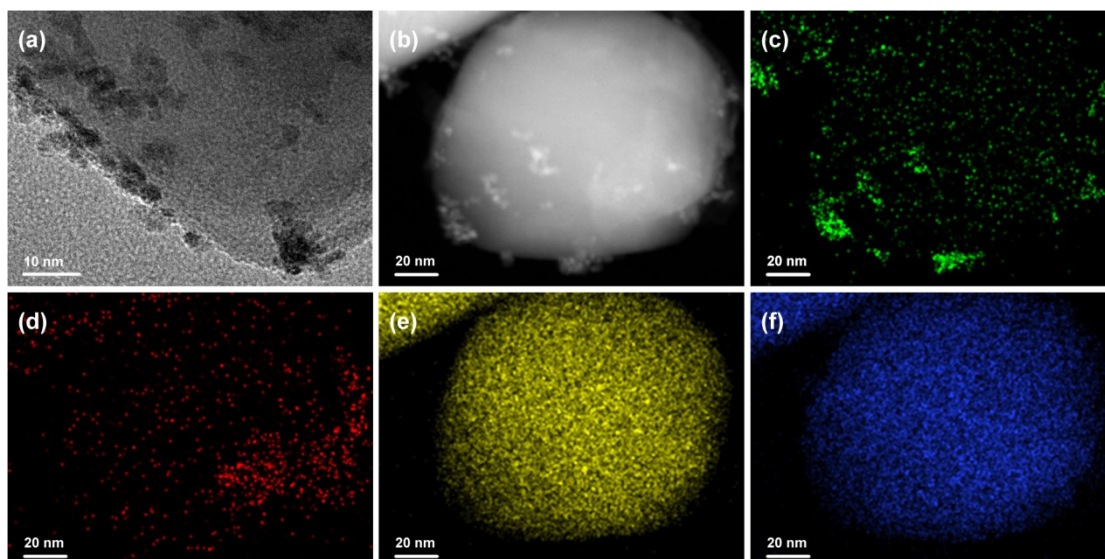

**Figure S9.** (a) TEM image of the spent Ru-Co/TiO<sub>2</sub> catalyst. The HAADF image (b) and corresponding EDS elemental mapping (c, Ru; d, Co; e, Ti; f, O) of Ru-Co/TiO<sub>2</sub>.

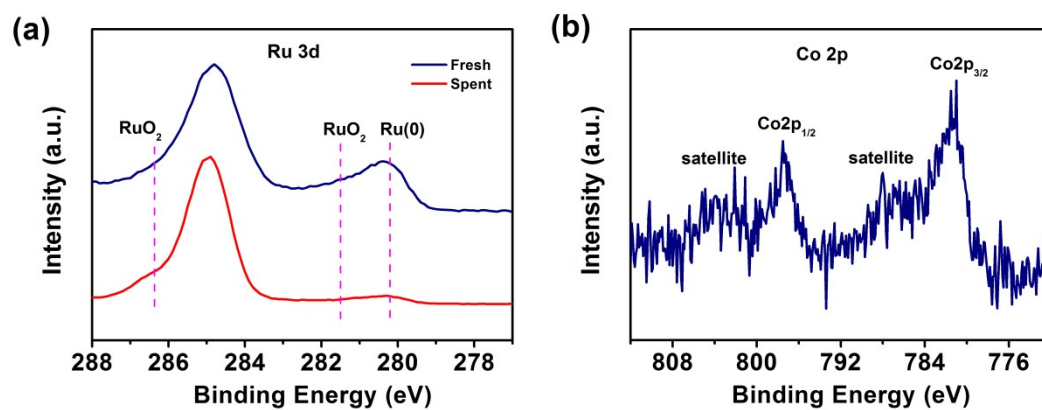

**Figure S10.** XPS spectra of the Ru-Co/TiO<sub>2</sub> catalyst: (a) Ru 3d of the fresh and spent catalyst; (b) Co 2p of the spent catalyst.
